# Supplementary material for: KIF1A promotes neuroendocrine differentiation in prostate cancer by regulating the OGT-mediated O-GlcNAcylation
Source: PubMed Central journal article supplement (PMC11542072; doi:10.1038/s41419-024-07142-2), 2024-11-06

Figure1

Figure1H KIF1A

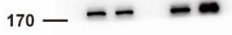

Figure1H GAPDH

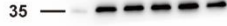

Figure2

Figure2F KIF1A

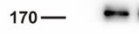

Figure2F NCAM1

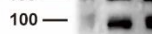

Figure2F ENO2

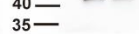

Figure2F SYP

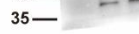

Figure2F GAPDH

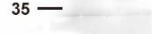

Figure2I KIF1A

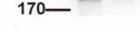

Figure2I KIF1A

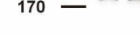

Figure2I KIF1A

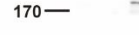

Figure2I NCAM1

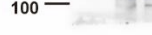

Figure2I NCAM1

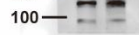

Figure2I NCAM1

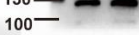

Figure2I ENO2

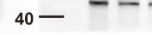

Figure2I ENO2

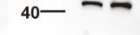

Figure2I ENO2

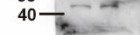

Figure2I SYP

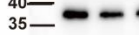

Figure2I SYP

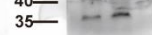

Figure2I SYP

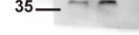

Figure2I GAPDH

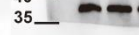

Figure2I GAPDH

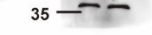

Figure2I GAPDH

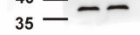

Figure2N KIF1A

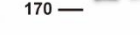

Figure2N KIF1A

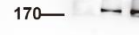

Figure2N KIF1A

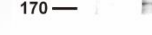

Figure2N N-Ca

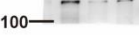

Figure2N N-Ca

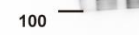

Figure2N N-Ca

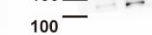

Figure2N E-Ca

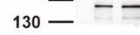

Figure2N E-Ca

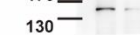

Figure2N E-Ca

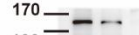

Figure2N Vimentin

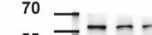

Figure2N Vimentin

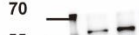

Figure2N Vimentin

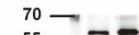

Figure2N GAPDH

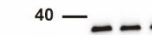

Figure2N GAPDH

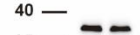

Figure2N GAPDH

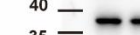

Figure2O KIF1A

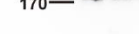

Figure2O KIF1A

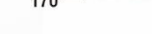

Figure2O KIF1A

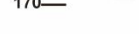

Figure2O OCT4

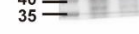

Figure2O OCT4

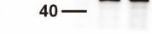

Figure2O OCT4

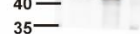

Figure2O CD133

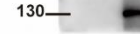

Figure2O CD133

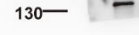

Figure2O CD133

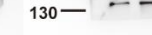

Figure2O SOX2

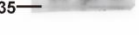

Figure2O SOX2

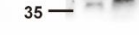

Figure2O SOX2

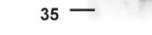

Figure2O BMI1

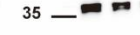

Figure2O BMI1

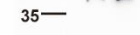

Figure2O BMI1

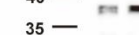

Figure2O GAPDH

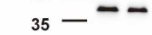

Figure2O GAPDH

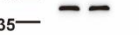

Figure2O GAPDH

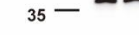

Figure3

Figure3N KIF1A

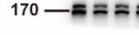

Figure3N GAPDH

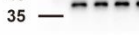

Figure 4

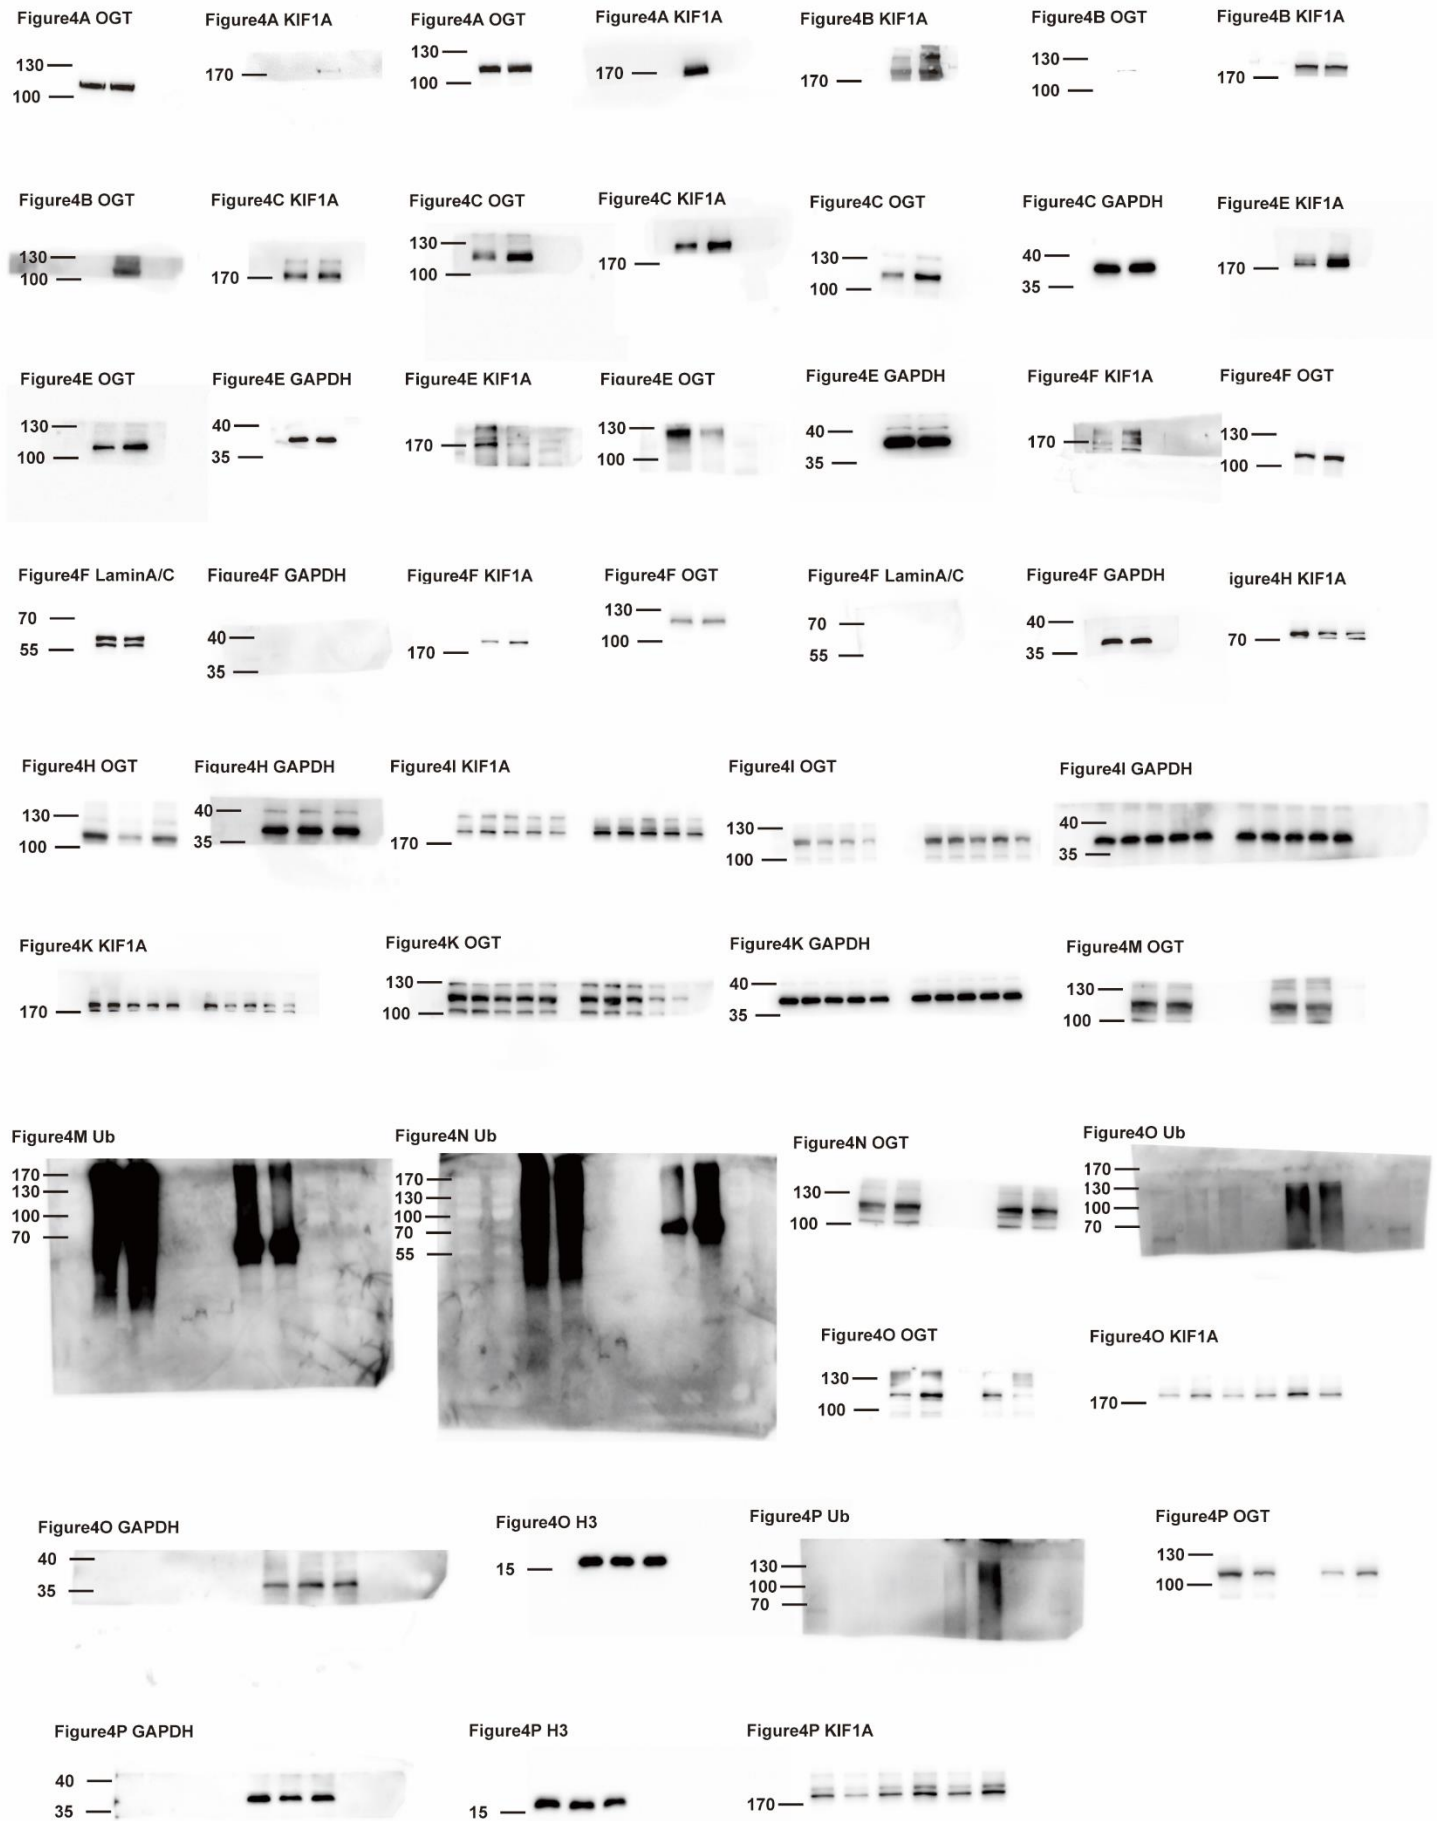

Figure5

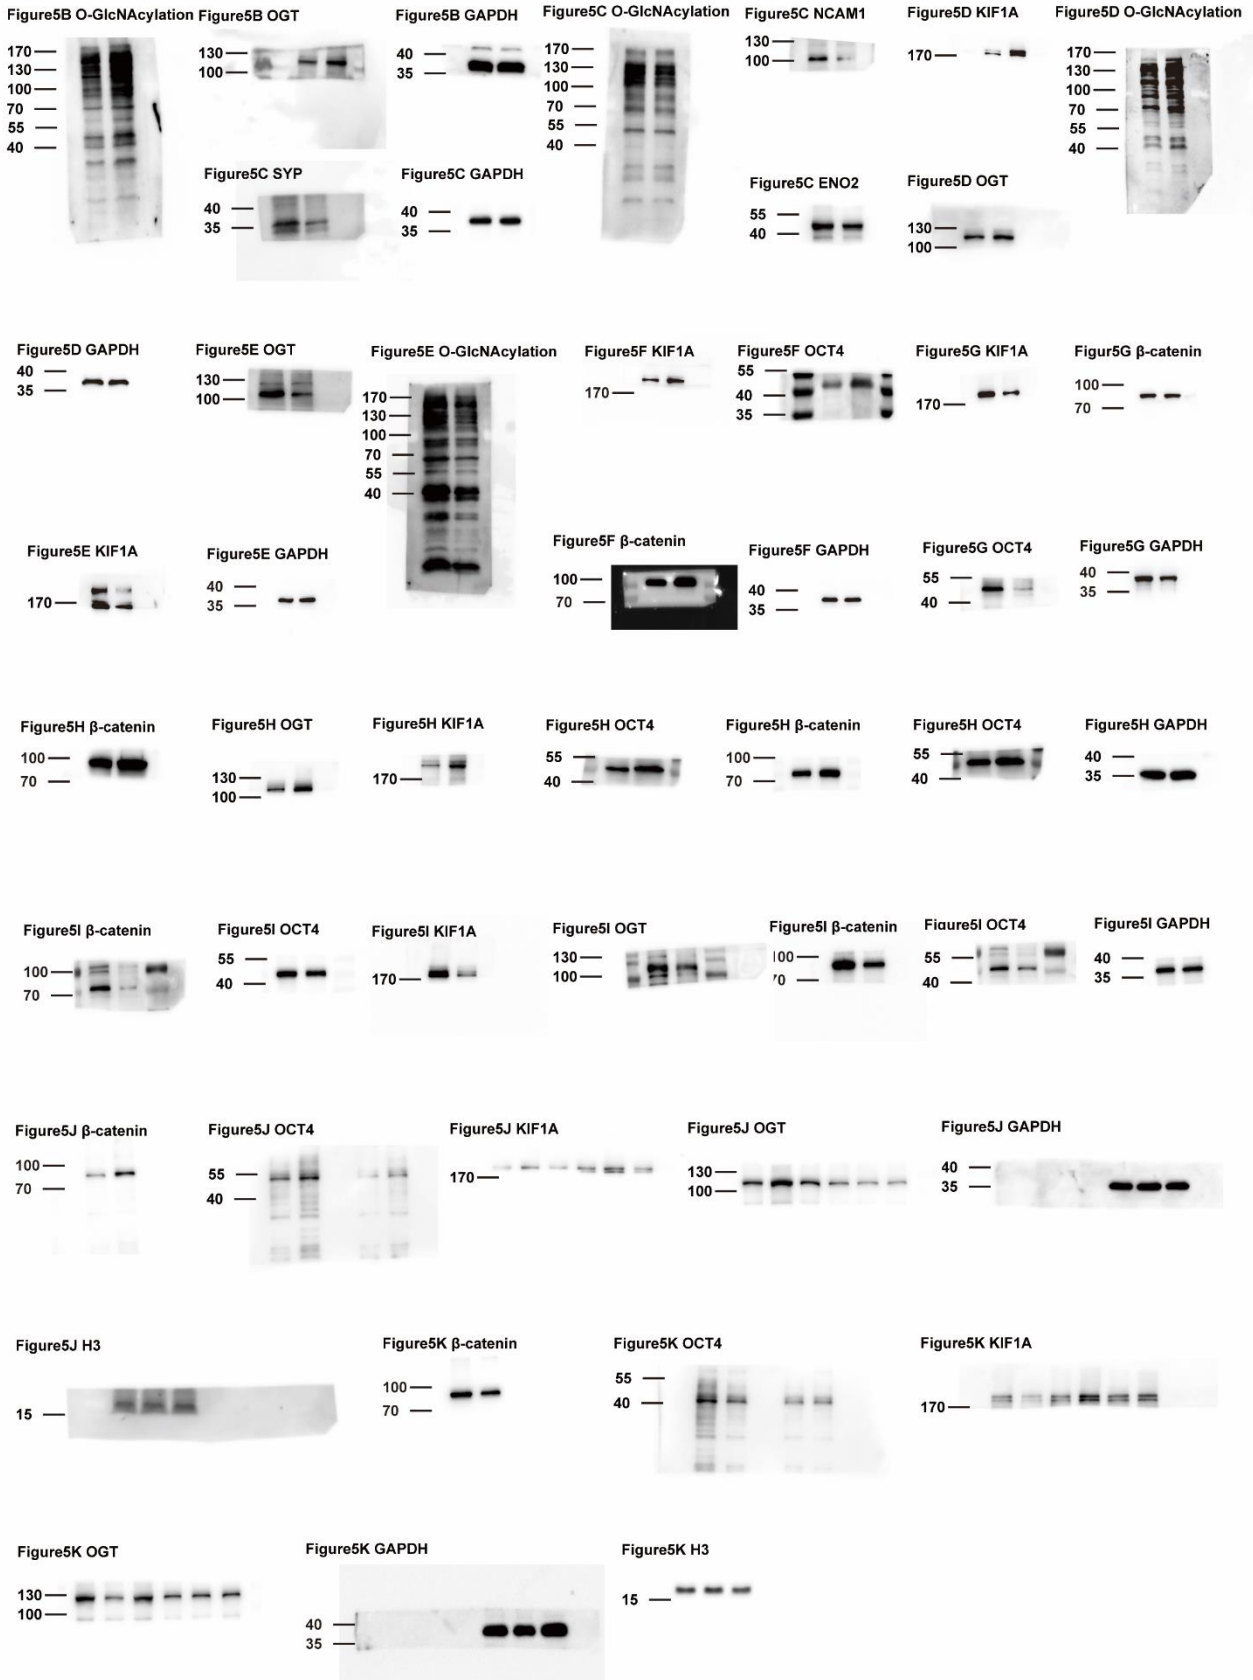

Figure6

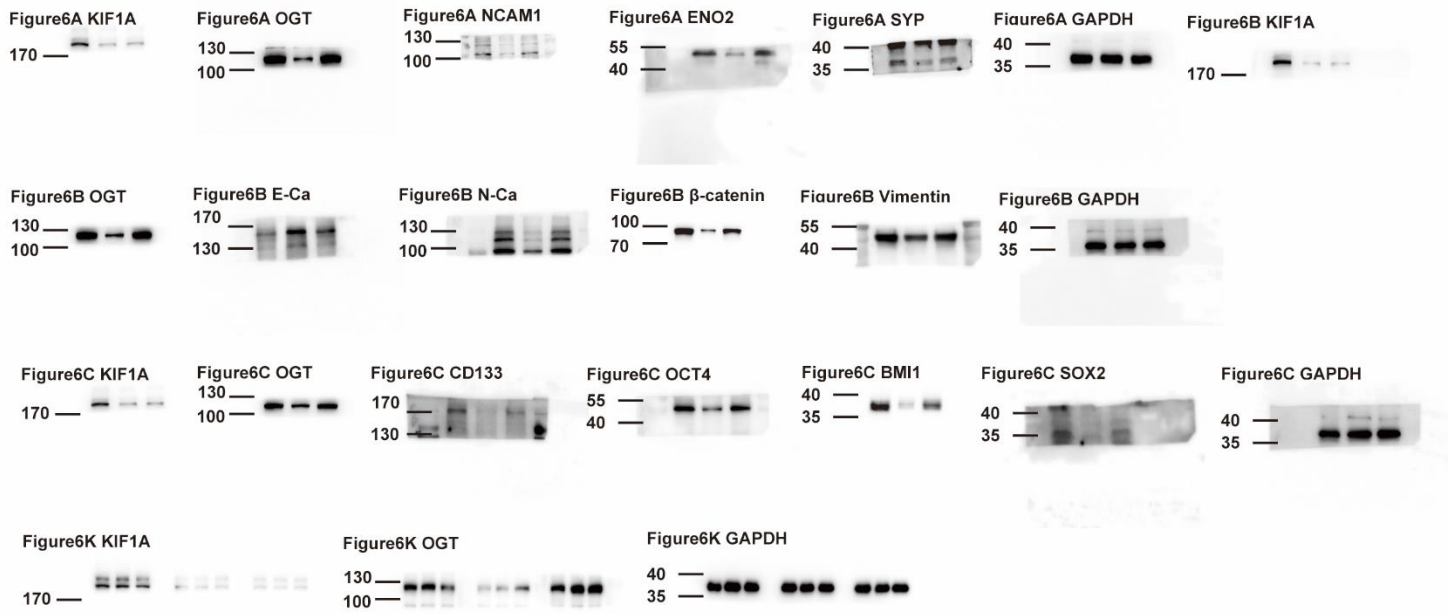

Supplementary Figure3

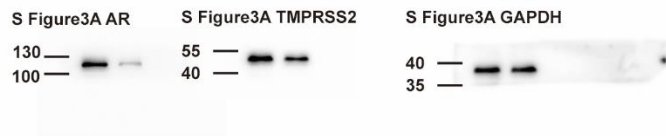

Supplementary Figure7

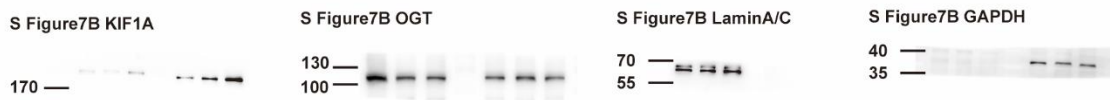

Supplementary Figure10

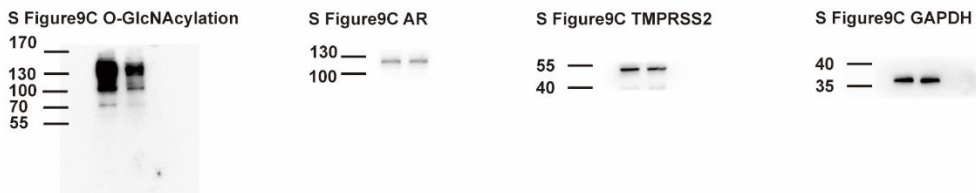

Supplement: 41419_2024_7142_MOESM4_ESM.pdf [file 41419_2024_7142_MOESM4_ESM.pdf]
